# Supplementary material for: Synthesis and photovoltaic properties of thiophene–imide-fused thiophene alternating copolymers with different alkyl side chains
Source: Royal Society of Chemistry journal article supplement (doi:10.1039/c1jm11531f), 2011-01-01
Supplement: c1jm11531f.pdf [file c1jm11531f.pdf]

## Supporting Information for

# Synthesis and Photovoltaic Properties of Thiophene–Imide-Fused Thiophene Alternating Copolymers with Different Alkyl Side Chains

Tomokazu Umeyama,<sup>1,2</sup> Masaaki Oodoi,<sup>1</sup> Osamu Yoshikawa,<sup>3</sup> Takashi Sagawa,<sup>3</sup> Susumu Yoshikawa,<sup>3</sup> Douvogianni Evgenia,<sup>1</sup> Noriyasu Tezuka,<sup>1</sup> Yoshihiro Matano,<sup>1</sup> Kati Stranius,<sup>4</sup> Nikolai V. Tkachenko,<sup>4</sup> Helge Lemmetyinen,<sup>4</sup> and Hiroshi Imahori<sup>1,5,6</sup>

<sup>1</sup>Department of Molecular Engineering, Graduate School of Engineering, Kyoto University, Nishikyo-ku, Kyoto, 615-8510, Japan

<sup>2</sup>PRESTO, Japan Science and Technology Agency (JST), 4-1-8 Honcho, Kawaguchi, Saitama 332-0012, Japan

<sup>3</sup>Institute of Advanced Energy, Kyoto University, Uji, Kyoto 611-0011, Japan

<sup>4</sup>Department of Chemistry and Bioengineering, Tampere University of Technology, P.O. Box 541, FIN-33101 Tampere

<sup>5</sup>Institute for Integrated Cell-Material Sciences (iCeMS), Kyoto University, Nishikyo-ku, Kyoto 615-8510, Japan

<sup>6</sup>Fukui Institute for Fundamental Chemistry, Kyoto University, 34-4, Takano-Nishihiraki-cho, Sakyo-ku, Kyoto 606-8103, Japan

## Monomer Synthesis

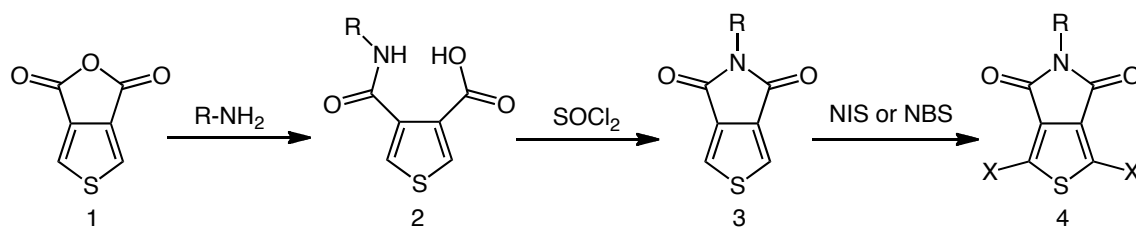

**4-[(1-Octadecylamino)carbonyl]-3-thiophenecarboxylic acid, 2 (n = 18).** A solution of thiophene-3,4-dicarboxylic anhydride **1** (468 mg, 3.04 mmol) and *n*-octadecylamine (873 mg, 3.24 mmol) in 50 mL of distilled toluene was refluxed for 24 h. The crude product was collected by filtration of the cold reaction mixture. Another portion of product was precipitated by washing the filtrate with 5 % hydrochloric acid and extracted with CHCl<sub>3</sub>, and then the solvent was evaporated. Recrystallization from toluene afforded **2 (n = 18)** (1.21 g, 2.86 mmol, 94 %) as white crystals. <sup>1</sup>H NMR δ<sub>H</sub> (400 MHz, CDCl<sub>3</sub>): 8.40 (d, 1H), 7.73 (d, 1H), 6.46 (broad s, 1H), 3.41 (t, 2H), 1.58 (quintet, 2H), 1.46 - 0.76 (m, 33H).

**4-[[1-(2-Pentylhexyl)amino]carbonyl]-3-thiophenecarboxylic acid, 2 (n = 11).** Yield (98%). <sup>1</sup>H NMR δ<sub>H</sub> (400 MHz, CDCl<sub>3</sub>): 8.43 (d, 1H), 8.07 (d, 1H), 6.95 (broad s, 1H), 4.11 (m, 1H), 1.56 (m, 4H), 1.30 (m, 12H), 0.87 (t, 6H).

**4-[[1-(2-Hexylheptyl)amino]carbonyl]-3-thiophenecarboxylic acid, 2 (n = 13).** Yield (94%). <sup>1</sup>H NMR δ<sub>H</sub> (400 MHz, CDCl<sub>3</sub>): 8.46 (d, 1H), 7.87 (d, 1H), 6.42 (broad s, 1H), 4.11 (m, 1H), 1.56 (m, 4H), 1.28 (m, 16H), 0.87 (t, 6H).

**5-Octadecyl-4H-thieno[3,4-c]pyrrole-4,6(5H)-dione, 3 (n = 18).** A solution of **2 (n = 18)** (1.21 g, 2.86 mmol) in 100 mL of thionyl chloride was refluxed for 3 h. The reaction mixture was concentrated to a light brown oil which was thoroughly dried to pale yellow crystals. Recrystallization from hexanes afforded **3 (n = 18)** (903 mg, 2.23 mmol, 78 %) as white crystals.  $^1\text{H NMR } \delta_{\text{H}}$  (400 MHz,  $\text{CDCl}_3$ ): 7.80 (s, 2H), 3.60 (t, 2H), 1.63 (quintet, 2H), 1.54 - 0.86 (m, 33H).

**5-(2-Pentylhexyl)-4H-thieno[3,4-c]pyrrole-4,6(5H)-dione, 3 (n = 11).** Yield (92%).  $^1\text{H NMR } \delta_{\text{H}}$  (400 MHz,  $\text{CDCl}_3$ ): 7.84 (s, 2H), 4.11 (m, 1H), 1.60 (m, 4H), 1.28 (m, 16H), 0.86 (t, 6H).

**5-(2-Hexylheptyl)-4H-thieno[3,4-c]pyrrole-4,6(5H)-dione, 3 (n = 13).** Yield (85%).  $^1\text{H NMR } \delta_{\text{H}}$  (400 MHz,  $\text{CDCl}_3$ ): 7.84 (s, 2H), 4.11 (m, 1H), 1.60 (m, 4H), 1.28 (m, 16H), 0.86 (t, 6H).

**1,3-Diiodo-5-dodecyl-4H-thieno[3,4-c]pyrrole-4,6(5H)-dione, 4 (n = 12, X = I).** **3 (n = 12)** (0.838 g, 2.70 mmol) was dissolved in 4.2 mL of concentrated sulfuric acid and 14.0 mL of trifluoroacetic acid. *N*-Iodosuccinimide (NIS) (2.44 g, 10.8 mmol) was added in two portions and the reaction mixture was stirred at room temperature for 24 h. The purple solution was then poured into 150 mL of ice water and extracted with dichloromethane. The organic phase was washed with 10 % sodium thiosulfate, dried over anhydrous magnesium sulfate and evaporated to afford the crude product as brown crystals. Purification by column chromatography using silica gel and dichloromethane/hexane (1:1) as eluent followed by recrystallization from aqueous ethanol

gave **4** (**n** = **12**, **X** = **I**) (0.868 g, 1.51 mmol, 56 %) as white crystals.  $^1\text{H NMR } \delta_{\text{H}}$  (400 MHz,  $\text{CDCl}_3$ ): 3.59 (dd, 2H), 1.62 (quintet, 2H), 1.25 (m, 18H), 0.88 (t, 3H).

**1,3-Dibromo-5-octadecyl-4H-thieno[3,4-c]pyrrole-4,6(5H)-dione, 4** (**n** = **18**, **X** = **Br**). **3** (**n** = **18**) (887 g, 2.19 mmol) was dissolved in 3.4 mL of concentrated sulfuric acid and 11.3 mL of trifluoroacetic acid. *N*-Bromosuccinimide (NBS) (1.56 g, 4.67 mmol) was added in two portions and the reaction mixture was stirred at 55 °C over night. The brown solution was then diluted with 120 mL of water and extracted with 150 mL of dichloromethane. The organic phase was dried over  $\text{MgSO}_4$  and evaporated to afford the crude product as orange crystals. Purification by column chromatography using silica gel with chloroform as eluent followed by recrystallization from ethanol gave **4** (**n** = **18**, **X** = **Br**) (716 mg, 1.27 mmol, 58 %) as white crystals.  $^1\text{H NMR } \delta_{\text{H}}$  (400 MHz,  $\text{CDCl}_3$ ): 3.58 (t, 2H), 1.62 (quintet, 2H), 1.53 - 0.86 (m, 33H).

**1,3-Diiodo-5-(2-Pentylhexyl)-4H-thieno[3,4-c]pyrrole-4,6(5H)-dione, 4** (**n** = **11**, **X** = **I**). Yield (61%).  $^1\text{H NMR } \delta_{\text{H}}$  (400 MHz,  $\text{CDCl}_3$ ): 4.09 (m, 1H), 1.83 (m, 4H), 1.24 (m, 12H), 0.86 (t, 6H).

**1,3-Diiodo-5-(2-Hexylheptyl)-4H-thieno[3,4-c]pyrrole-4,6(5H)-dione, 4** (**n** = **13**, **X** = **I**). Yield (58%).  $^1\text{H NMR } \delta_{\text{H}}$  (400 MHz,  $\text{CDCl}_3$ ): 4.09 (m, 1H), 1.83 (m, 4H), 1.24 (m, 16H), 0.86 (t, 6H).

**Table S1** Fluorescence Lifetimes ( $\tau$ ) of PnTPDT and P3HT in Chloroform Solutions and Film States

| Polymer | $\tau$ in CHCl <sub>3</sub> (ns) | $\tau$ in solid states (ns) <sup>a</sup> |
|---------|----------------------------------|------------------------------------------|
| P12TPDT | 0.8                              | 0.2 (97%), 0.6 (3%)                      |
| P18TPDT | 1.1                              | 0.2 (97%), 0.7 (3%)                      |
| P11TPDT | 1.2                              | 0.3 (89%), 0.6 (11%)                     |
| P13TPDT | 1.0                              | 0.3 (85%), 0.6 (15%)                     |
| P3HT    | 0.5                              | < 0.1                                    |

<sup>a</sup> The component ratio of each fluorescence lifetime is given in parenthesis.

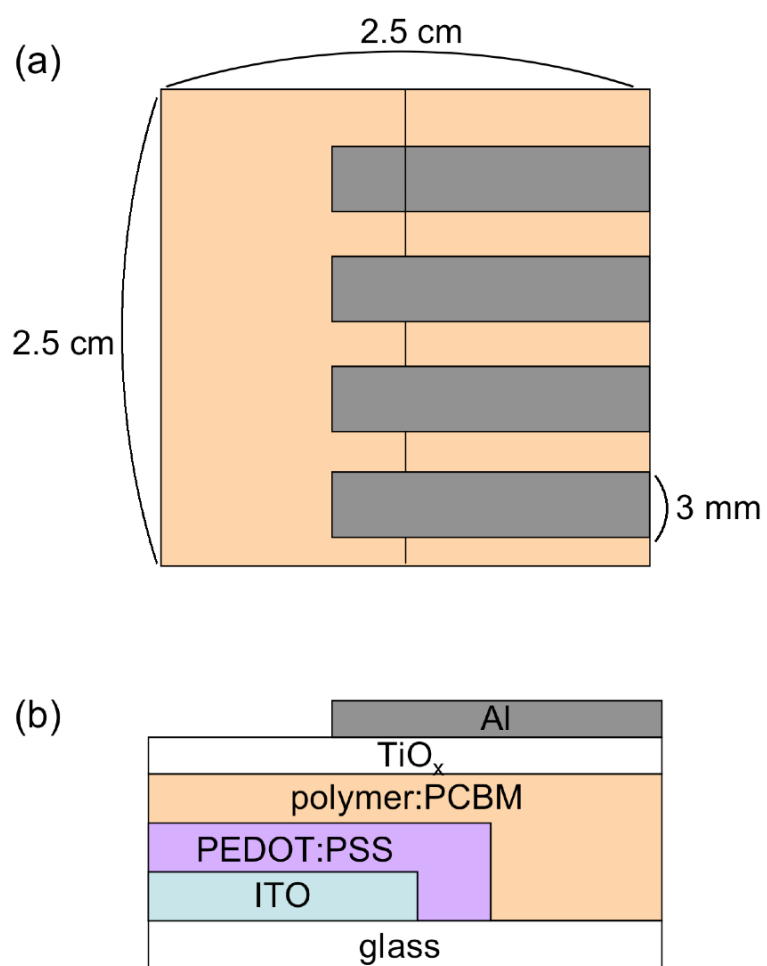

**Fig. S1** Schematic illustrations of (a) top and (b) side views of the ITO/PEDOT:PSS/polymer:PCBM/ $\text{TiO}_x$ /Al device.

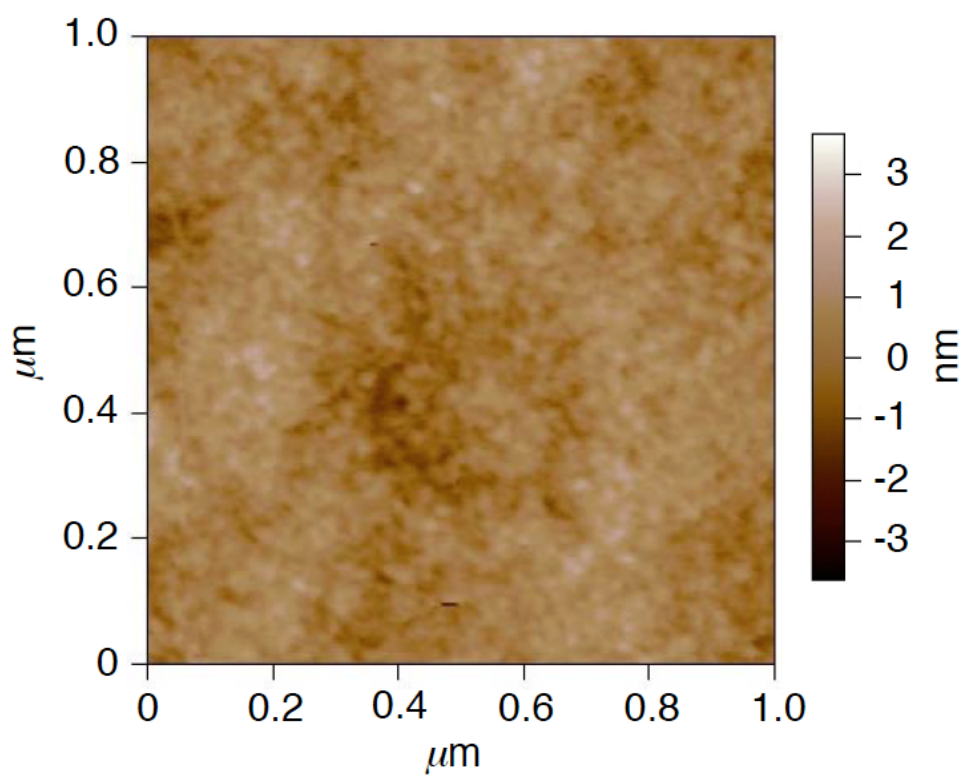

**Fig. S2** Tapping-mode atomic force micrograph of P3HT:PCBM film. The color scale represents the height topography, with bright and dark representing the highest and lowest features, respectively.
